# Supplementary material for: Ambient particulate matter and biomass burning: an ecological time series study of respiratory and cardiovascular hospital visits in northern Thailand
Source: Environ Health. 2020 Jul 3;19:77. doi: 10.1186/s12940-020-00629-3 (PMC7333306; doi:10.1186/s12940-020-00629-3)
Supplement: Supplementary file 2 — Additional file 2: Figure S2. The average predicted number of a) Chronic Lower Respiratory Disease (CLRD), b) Ischaemic Heart Disease (IHD), and c) Cerebrovascular Disease (CVD) visits relating to daily mean PM10 exposure. [file 12940_2020_629_MOESM2_ESM.docx]

**Figure S2**. The average predicted number of a) Chronic Lower Respiratory Disease (CLRD), b) Ischaemic Heart Disease (IHD), and c) Cerebrovascular Disease (CVD) visits relating to daily mean PM10 exposure.


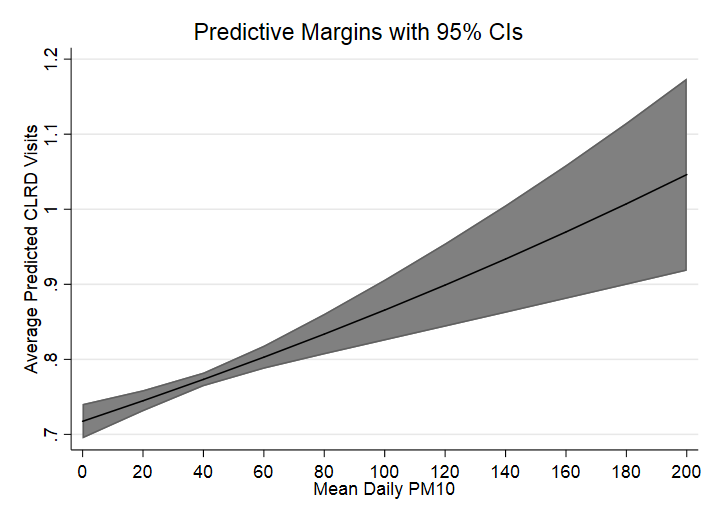
a)


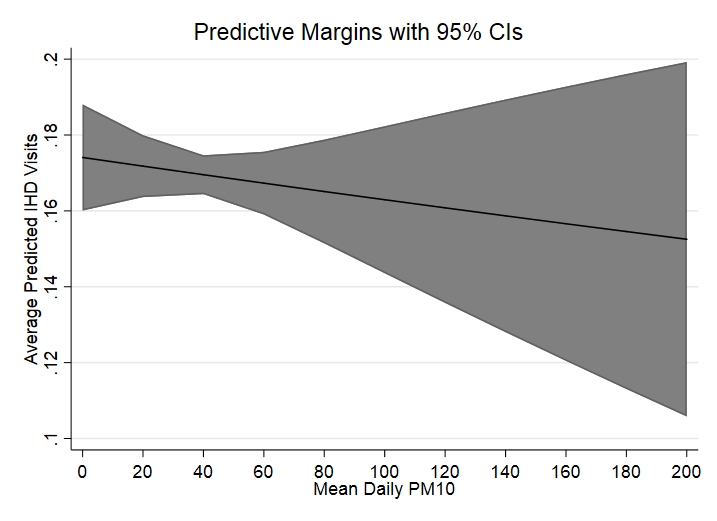
b)


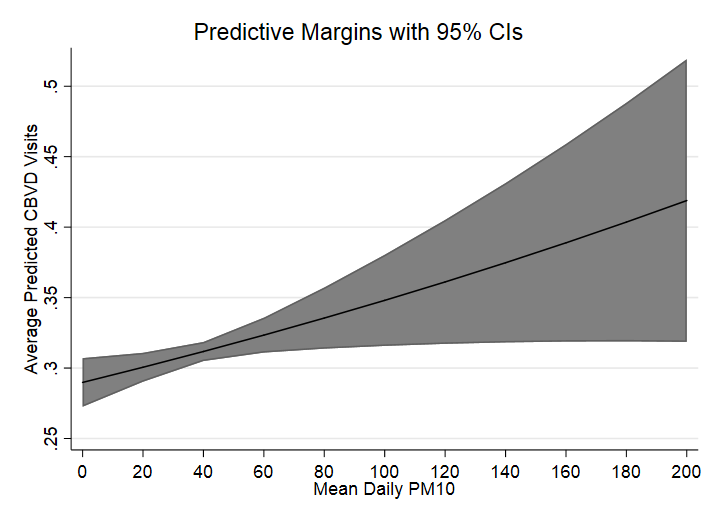
c)
